# Supplementary material for: Self-supervised and semi-supervised learning for road condition estimation from distributed road-side cameras
Source: PubMed Central journal article supplement (PMC9792450; doi:10.1038/s41598-022-26180-4), 2022-12-26
Supplement: 41598_2022_26180_MOESM1_ESM.pdf [file 41598_2022_26180_MOESM1_ESM.pdf]

## Appendix

| Camera site | Acquisition period | Orientation | Camera model                   |
|-------------|--------------------|-------------|--------------------------------|
| A1          | 02/2020 - 05/2020  | -45         | AXIS_P1435-LE                  |
| A2          | 02/2020 - 05/2020  | 45          | AXIS_P1435-LE                  |
| A3          | 07/2018 - 07/2019  | -90         | AXIS_Q1765                     |
| A4          | 10/2018 - 07/2019  | 180         | HIKVISION_DS-2CD4525FWD-IZ (H) |
| A5          | 10/2018 - 05/2020  | 180         | AXIS_P1435-LE                  |
| A6          | 10/2018 - 07/2019  | 45          | HIKVISION_DS-2CD4525FWD-IZ (H) |
| A7          | 07/2018 - 09/2018  | 45          | HIKVISION_DS-2CD4525FWD-IZ (H) |
| A8          | 10/2019 - 11/2019  | 180         | HIKVISION_DS-2CD4525FWD-IZ (H) |
| A9          | 08/2018 - 07/2019  | 0           | AXIS_Q6054-E                   |
| A10         | 02/2020 - 05/2020  | 45          | AXIS_P1435-LE                  |

**Table 8.** Characteristics of the cameras included in this analysis. Orientation denotes the direction the camera is pointed towards, calculated with respect to the North. Information was not available for all sites.
